# Supplementary material for: Molecular determinants of resistance to antiandrogen therapy
Source: Springer Nature journal article supplement (doi:10.1038/nm972), 2003-12-21
Supplement: 41591_2004_BFnm972_MOESM2_ESM.pdf [file 41591_2004_BFnm972_MOESM2_ESM.pdf]

## Supplementary Figure 2

| <u>Affy ID</u> | <u>GenBank ID</u> | <u>Gene Name</u>                                   |
|----------------|-------------------|----------------------------------------------------|
| 212005         | AL582808          | DKFZP566C0424 protein                              |
| 213017         | NM_138340         | abhydrolase domain containing 3                    |
| 201662         | D89053.1          | Acyl-CoA synthetase 3                              |
| 216323         | XM_054284         | alpha-tubulin isotype H2-alpha                     |
| 211689         | AF270487.1        | androgen-regulated serine protease (TMPRSS2)       |
| 205102         | NM_005656         | androgen-regulated serine protease (TMPRSS2)       |
| 215990         | S67779.1          | BCL5                                               |
| 203356         | NM_014296         | calpain 7                                          |
| 222201         | AB037736.1        | CASP8 associated protein 2                         |
| 221272         | NM_030806.1       | chromosome 1 open reading frame 21 (C1ORF21)       |
| 222121         | NM_015595         | DKFZP434D146 protein                               |
| 212665         | NM_015508         | DKFZP434J214 protein                               |
| 209389         | M15887.1          | endozepine                                         |
| 204560         | NM_004117.1       | FK506-binding protein 5 (FKBP5)                    |
| 210892         | BC004472.1        | general transcription factor II                    |
| 219312         | NM_023929.1       | hypothetical protein FLJ12752                      |
| 219476         | NM_024115.1       | hypothetical protein MGC4309                       |
| 210339         | BC005196.1        | kallikrein 2 (KLK2)                                |
| 209854         | NM_005551         | kallikrein 2 (KLK2)                                |
| 204583         | U17040.1          | kallikrein 3/prostate specific antigen (PSA/KLK3)  |
| 204582         | NM_001648         | kallikrein 3/prostate specific antigen (PSA/KLK3)  |
| 212789         | XM_166201         | KIAA0056 protein                                   |
| 205862         | NM_014668.1       | KIAA0575 gene product (KIAA0575)                   |
| 201551         | J03263.1          | lysosome-associated membrane glycoprotein (lamp A) |

| <u>Affy ID</u> | <u>GenBank ID</u> | <u>Gene Name</u>                                                                      |
|----------------|-------------------|---------------------------------------------------------------------------------------|
| 206205         | NM_022782.1       | M-phase phosphoprotein 9 (MPHOSPH9)                                                   |
| 221965         | NM_022782         | M-phase phosphoprotein 9 (MPHOSPH9)                                                   |
| 208309         | NM_006785.1       | mucosa associated lymphoid tissue lymphoma translocation gene 1 (MALT1)               |
| 214087         | NM_002465         | myosin binding protein C, slow type                                                   |
| 211548         | J05594.1          | NAD <sup>+</sup> -dependent 15-hydroxyprostaglandin dehydrogenase (PDGH)              |
| 205040         | NM_000607.1       | orosomuroid 1 (ORM1)                                                                  |
| 205041         | NM_000607.1       | orosomuroid 1 (ORM1)                                                                  |
| 220954         | NM_013440.1       | paired immunoglobulin-like receptor beta (PILR(BETA))                                 |
| 206178         | NM_000929.1       | phospholipase A2, group V (PLA2G5)                                                    |
| 214443         | NM_006505.1       | poliovirus receptor (PVR)                                                             |
| 218782         | NM_014109.1       | PRO2000 protein (PRO2000)                                                             |
| 205924         | BC005035.1        | RAB3B                                                                                 |
| 201975         | NM_002956.1       | restin (Reed-Steinberg cell-expressed intermediate filament-associated protein) (RSN) |
| 201562         | NM_003104         | sorbitol dehydrogenase (SORD)                                                         |
| 216920         | M27331.1          | T cell receptor gamma-chain                                                           |
| 215806         | M13231.1          | T-cell receptor aberrantly rearranged gamma-chain                                     |
| 209813         | M16768.1          | T-cell receptor gamma chain VJCI-CII-CIII region                                      |
| 211144         | M30894.1          | T-cell receptor Ti rearranged gamma-chain                                             |
| 201108         | NM_003246         | thrombospondin 1                                                                      |
| 222118         | AK023669.1        | uncharacterized bone marrow protein BM039                                             |
| 219555         | NM_018455         | uncharacterized bone marrow protein BM039 (BM039)                                     |
| 219551         | NM_018456.1       | uncharacterized bone marrow protein BM040 (BM040)                                     |
| 209053         | BE793789          | Wolf-Hirschhorn syndrome candidate 1 /FL=gb:AF083389.1                                |
| 209309         | D90427.1          | zinc-alpha2-glycoprotein                                                              |

**Supplementary Fig. 2** – 48 bicalutamide-induced probe sets in LNCaP-androgen receptor cells.
