# Supplementary material for: Molecular determinants of resistance to antiandrogen therapy
Source: Springer Nature journal article supplement (doi:10.1038/nm972), 2003-12-21
Supplement: 41591_2004_BFnm972_MOESM3_ESM.pdf [file 41591_2004_BFnm972_MOESM3_ESM.pdf]

# Supplementary Figure 3

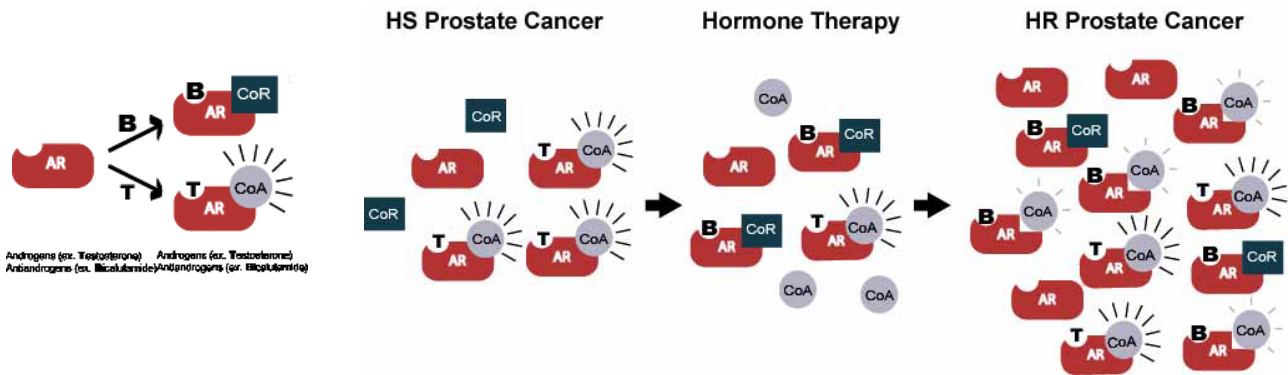

**Supplementary Fig. 3 – Model of prostate cancer progression** Hormone therapy, consisting of androgen-lowering drugs and competitive androgen receptor antagonists, decreases the number of active receptors leading to a clinical response (hormone sensitive disease). Failure of therapy (hormone refractory disease) results from increased receptor level which inverts the response to antagonists and amplifies the response to all ligands – residual androgens, antagonists and other steroids (not depicted).
